# Supplementary material
Source: Springer Nature journal article supplement (https://www.springermedizin.de/resource/supplementary/12985_2006_192_MOESM1_ESM.pdf/9607460)

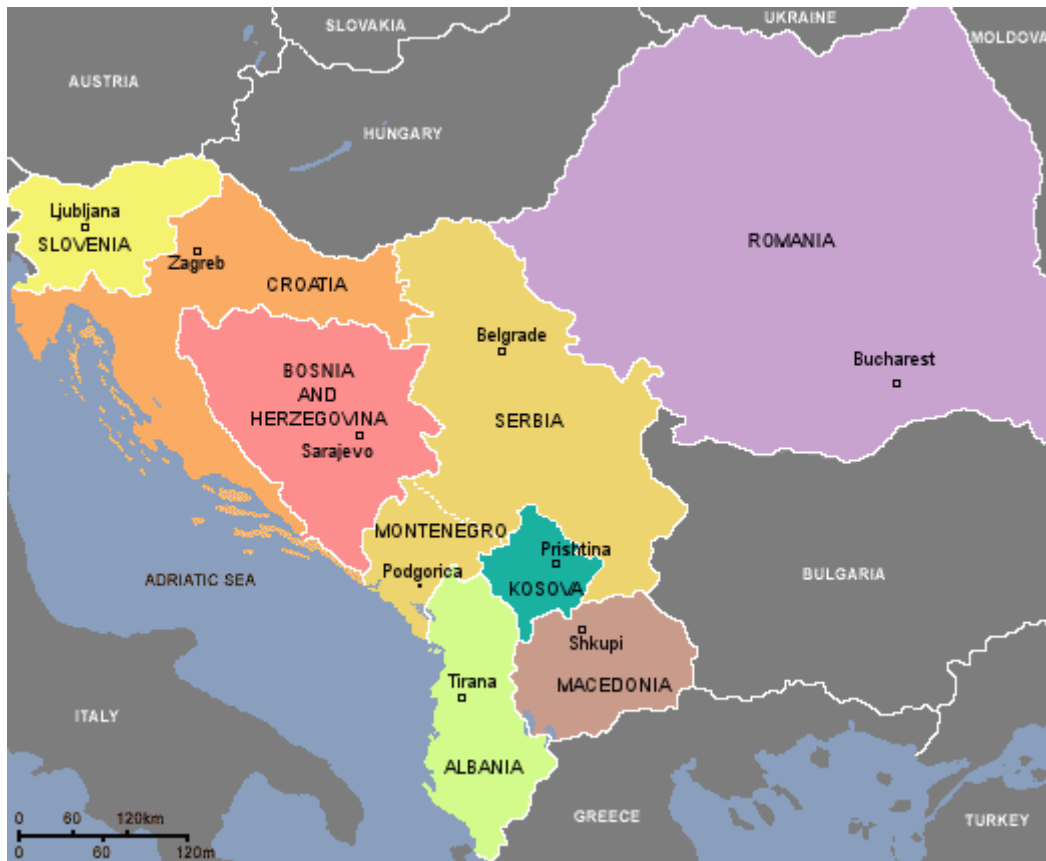

Supplement: MOESM1 [file 9607460]
